# Supplementary material
Source: ML conference proceedings conference paper supplement (https://openaccess.thecvf.com/content/WACV2021/html/Nikhal_Unsupervised_Attention_Based_WACV_2021_paper.html)
Supplement: Supplementary file 1 [file Nikhal_Unsupervised_Attention_Based_WACV_2021_supplemental.pdf]

# Supplementary Results

Unsupervised Attention Based Instance Discriminative Learning for  
Person Re-Identification

Paper ID – **0347**

# BUC

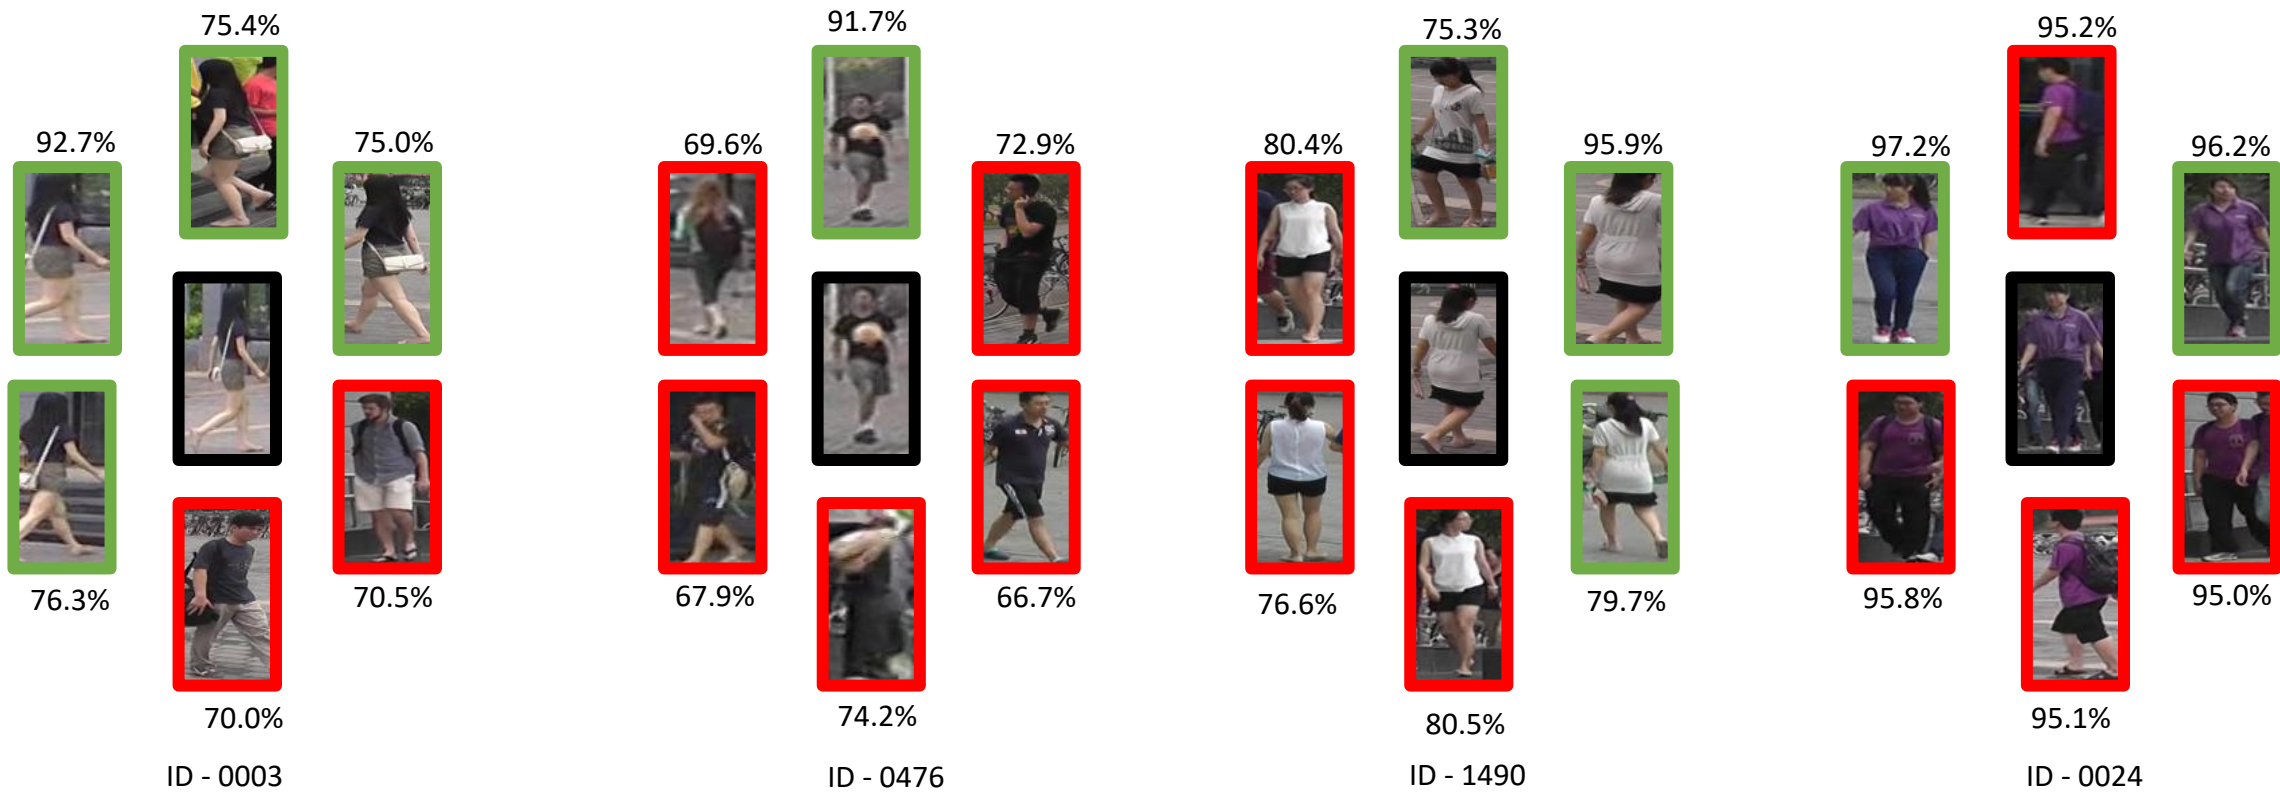

Figure 1. The figure shows several query images from the Market1501 dataset and their corresponding most similar matches according to their percent similarity when using BUC. Query - Center Image with **black** border, True Positives – Images with **Green** Border, False Positives – Images with **Red** border.

# GAM

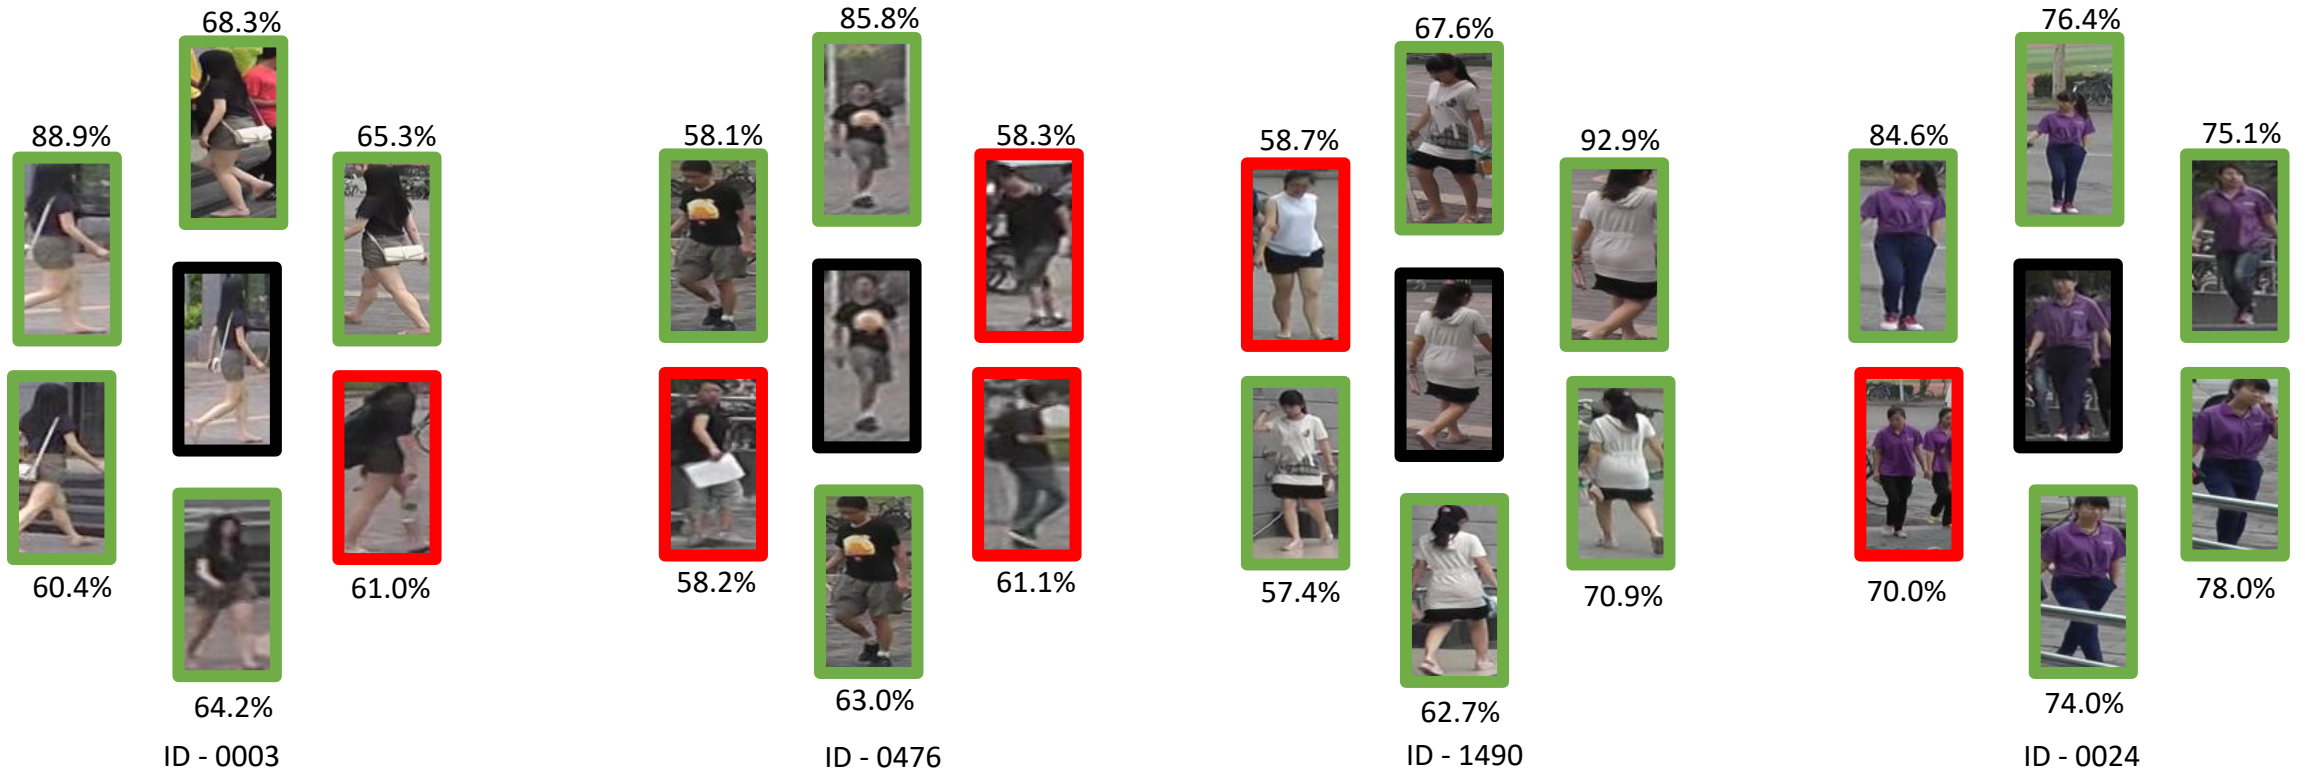

Figure 2. The figure shows several query images from the Market1501 dataset and their corresponding most similar matches according to their percent similarity when using GAM. Query - Center Image with **black** border, True Positives – Images with **Green** Border, False Positives – Images with **Red** border.
